# Supplementary material
Source: PubMed Central journal article supplement (PMC4073795)
Supplement: NIHMS582462-supplement-Box_3.pdf [file NIHMS582462-supplement-Box_3.pdf]

| Gene name | Alternate names                         | Methyl mark         | Chromosomal location | Fused gene                           | Chromosomal translocation                                                                                                                                                                                                                                                                                       | Cancer type associated with translocation                                     |
|-----------|-----------------------------------------|---------------------|----------------------|--------------------------------------|-----------------------------------------------------------------------------------------------------------------------------------------------------------------------------------------------------------------------------------------------------------------------------------------------------------------|-------------------------------------------------------------------------------|
| KMT2A     | MLL1/HRX/<br>TRX1/<br>ALL1/<br>TET1-MLL | H3K4                | 11q23                | AF4, ELL,<br>AF9, ENL,<br>AF6, . . . | t(X;11)(q13;q23),<br>t(1;11)(p32;q23),<br>t(1;11)(q21;q23),<br>t(2;11)(p21;q23),<br>t(4;11)(q21;q23),<br>t(6;11)(q27;q23),<br>t(9;11)(p22;q23),<br>t(10;11)<br>(p11-13;q23),<br>t(11;11)(q23;q25),<br>t(11;14)(q23;q32),<br>t(11;17)(q23;q12),<br>t(11;17)(q23;q21),<br>t(11;17)(q23;q25),<br>t(11;19)(q23;p13) | Acute myeloid leukemia, acute lymphoblastic leukaemia, mixed lineage leukemia |
| KMT2D     | MLL4/ALR                                | H3K4                | 19q13.1              | HBx,                                 | t(19;17)(q13;p11)                                                                                                                                                                                                                                                                                               | Hepatocellular carcinoma, Hepatitis B virus related HCCs                      |
| KMT3B     | NSD1/STO/<br>SOTOS                      | H3K36               | 5q35                 | NUP98                                | t(5,11)(q35;p15.5),<br>t(5,2)(q35;p23)                                                                                                                                                                                                                                                                          | Acute myeloid leukemia, Sotos syndrome                                        |
| NSD2      | WHS/TRX5/<br>MMSET                      | H3K36me2            | 4p16.3               | IGH                                  | t(4;14)(p16;q32)                                                                                                                                                                                                                                                                                                | Multiple myeloma tumors, lung cancers, Wolf-Hirschhorn syndrome               |
| NSD3      | WHSC1L1                                 | K3K36me2            | 8p11.2               | NUP98                                | t(8;11)(p11;p15),<br>t(8;16)(p11;p13)                                                                                                                                                                                                                                                                           | Acute myeloid leukemia, myelodysplastic syndrome                              |
| KDM4C     | JMJD2C/<br>GASC1/<br>JHDM3C             | H3K9/<br>H3K36me2/3 | 9p24.1               | IGH                                  | t(9;14)(p24.1;q32)                                                                                                                                                                                                                                                                                              | Mucosa-associated lymphoid tissue lymphoma, chronic myeloid leukemia          |
| KDM5A     | JARID1A/<br>RBP2/<br>RBBP2              | H3K4me2/3           | 12p11                | NUP98                                | t(11;21;12)<br>(p15;p13;p13)                                                                                                                                                                                                                                                                                    | Acute myeloid leukemia                                                        |
| JMJD1C    | TRIP8                                   | H3K9                | 10q21.3              |                                      | 46,XY,inv(10)<br>(q11.1;q21.3)                                                                                                                                                                                                                                                                                  | Autism                                                                        |
| HSPBAP1   | PASS1                                   | ?                   | 3q21.1               | DIRC3                                | t(2;3)(q35;q21)                                                                                                                                                                                                                                                                                                 | Familial renal cell cancer                                                    |
