# Supplementary material
Source: PubMed Central journal article supplement (PMC4073795)

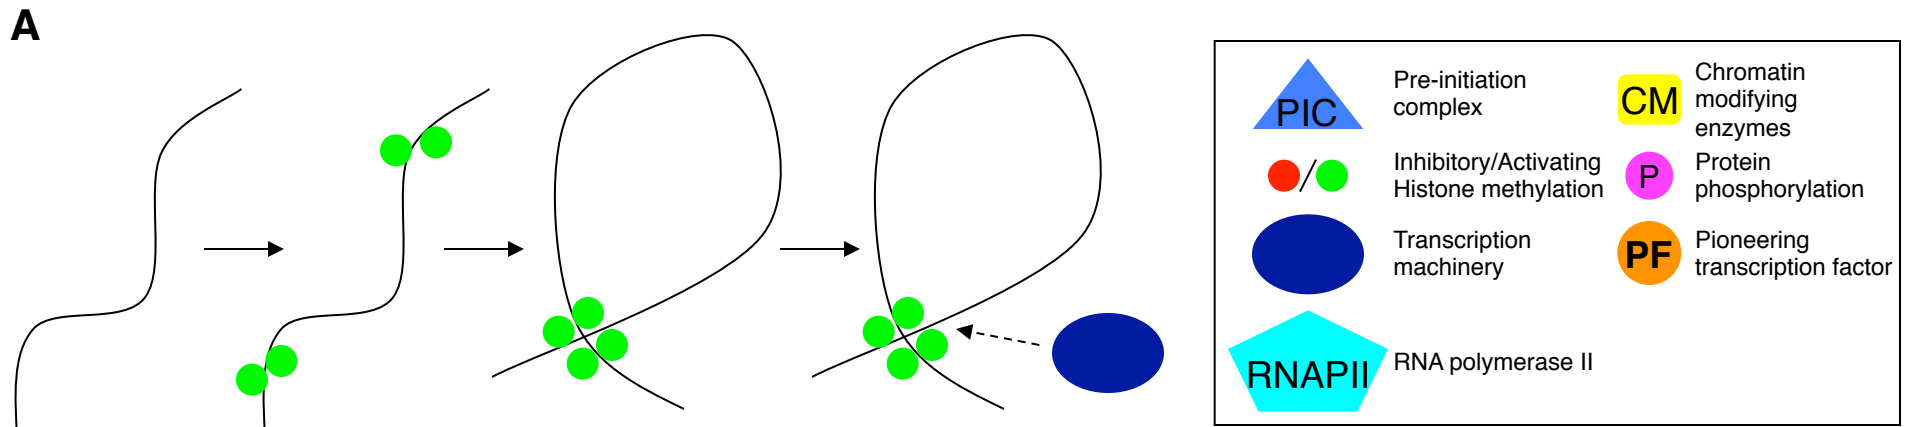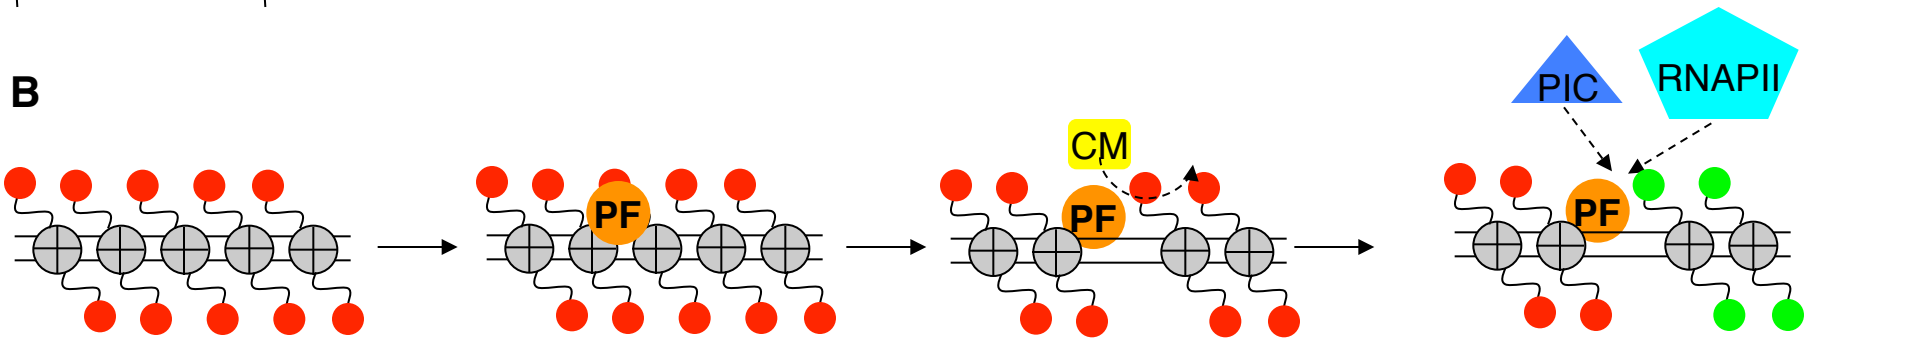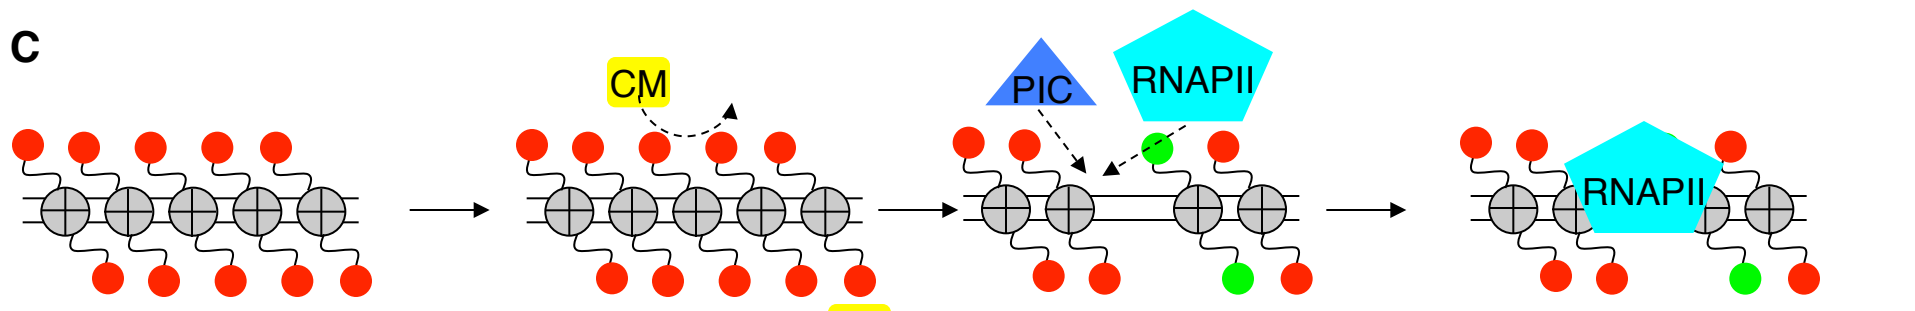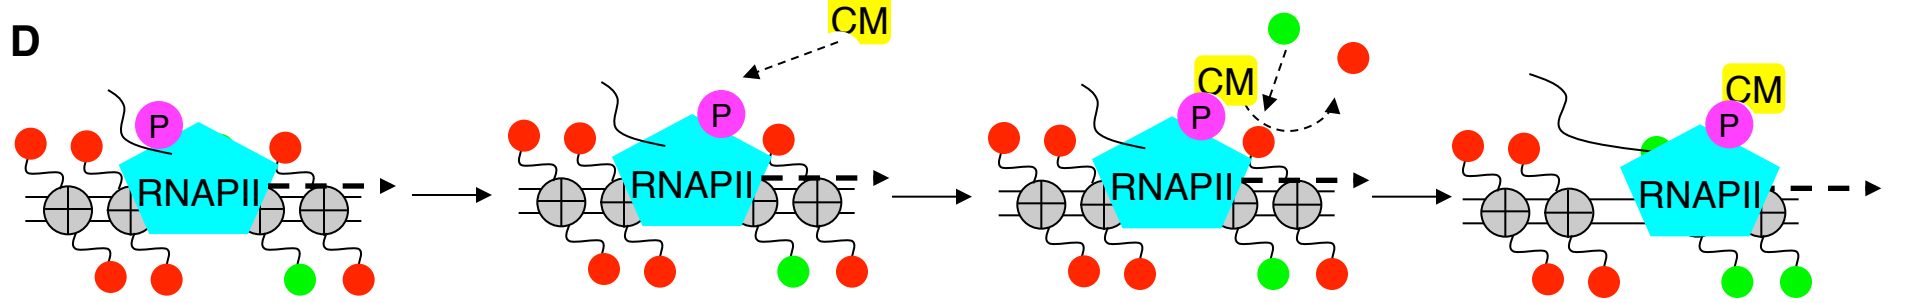

Supplement: NIHMS582462-supplement-Box_1.pdf [file NIHMS582462-supplement-Box_1.pdf]
